# Supplementary material for: Attitudes towards urban stray cats and managing their population in India: a pilot study
Source: Frontiers journal article supplement (doi:10.3389/fvets.2023.1274243), 2023-10-27
Supplement: Data_Sheet_1.pdf [file Data_Sheet_1.pdf]

## Stray Cats In India

Hello, I'm working on a study to collect information on stray cats in India. As you may be aware, the expansion of cities has had a big impact on stray animals. Your feedback will help in the management of stray cats. The questions will take about 5-7 minutes to answer. The survey is anonymous. Please answer each question as honestly as possible, as this will help in getting a good picture of the real situation. Thank you!

**For the following questions, please answer Yes or No:**

1. Are you aware of any stray cats in your neighborhood where you live or around where you work/study?

Yes

No

2. Have you seen a stray cat in the past month?

Yes

No

3. Have you ever heard about programs to catch, sterilize (so they can't have any kittens) and return stray cats to their neighborhood?

Yes

No

4. Have you ever shooed off a stray cat who you thought was being a nuisance?

Yes

No

5. Have you ever been bitten or scratched by a stray cat?

Yes

No

6. Do you feed or have you ever fed any stray cats?

Yes

No

7. Have you ever taken a stray cat to a vet?

Yes

No

8. Have you ever adopted a stray cat and taken it home?

Yes

No

**For the following questions, please choose your response from:**

**Strongly Agree, Somewhat Agree, Unsure, Somewhat Disagree, Strongly Disagree**

|    | Question                                                                                                                           | Strongly Agree | Somewhat Agree | Unsure | Somewhat Disagree | Strongly Disagree |
|----|------------------------------------------------------------------------------------------------------------------------------------|----------------|----------------|--------|-------------------|-------------------|
| 9  | The welfare of stray cats is important                                                                                             |                |                |        |                   |                   |
| 10 | Stray cats are dirty and stink up the place where they are                                                                         |                |                |        |                   |                   |
| 11 | Stray cats spread diseases to humans                                                                                               |                |                |        |                   |                   |
| 12 | Stray cats are a nuisance and disturb humans with their loud fighting                                                              |                |                |        |                   |                   |
| 13 | People who feed stray cats are creating a bigger problem                                                                           |                |                |        |                   |                   |
| 14 | Local governments/municipal corporations should remove all the stray cats and euthanise (kill) them like they used to do with dogs |                |                |        |                   |                   |
| 15 | Stray cat numbers should be reduced by sterilizing them so they are unable to have more kittens                                    |                |                |        |                   |                   |
| 16 | People who feed stray cats are improving the welfare of cats                                                                       |                |                |        |                   |                   |
| 17 | Feeding a stray cat would make me feel good                                                                                        |                |                |        |                   |                   |
| 18 | Local governments/municipal corporations should have stray cat sterilizing programs in the city to control their population        |                |                |        |                   |                   |

**The next few questions are about you:**

19. Have you ever had a pet at home (currently or in the past)? Please check all that apply.

Never had any pets

Cat/s

Dog/s

Other pet/s

20. Gender

Male

Female

Other

Would rather not say

21. Age

18-29 30-44

45-59

60 and over

22. Education

No formal qualifications

Primary school up to 4<sup>th</sup> standard

Secondary school up to 10<sup>th</sup> standard

Some college, but not graduated

College graduate or higher

23. City/Town of Residence

Ahmedabad

Bengaluru

Bhubaneswar

Chennai

Delhi

Kochi

Kolkata

Lucknow

Mumbai

Nagpur

Patna

Varanasi

Vijayawada
